# Supplementary material for: Psychometric Properties and Meaningful Change Thresholds of the Vitiligo Area Scoring Index
Source: PubMed Central journal article supplement — JAMA Dermatol. 2024 Oct 30;161(1):39–46. doi: 10.1001/jamadermatol.2024.4534 (PMC11581646; doi:10.1001/jamadermatol.2024.4534), 2024-10-30
Supplement: jamadermatol-e244534-s003.pdf [file jamadermatol-e244534-s003.pdf]

## Data Sharing Statement

Ezzedine. Psychometric Properties and Meaningful Change Thresholds of the Vitiligo Area Scoring Index. *JAMA Dermatol*. Published October 30, 2024.

doi:10.1001/jamadermatol.2024.4534

### Data

**Data available:** Yes

**Data types:** Deidentified participant data

**How to access data:** Qualified researchers engaged in rigorous, independent scientific research can request access to our anonymized clinical trial data. Access will be provided following receipt of a research proposal and Statistical Analysis Plan, review of the proposal and Statistical Analysis Plan, and execution of a Data Use Agreement (DUA). All requests from qualified researchers for access to AbbVie clinical data and information will be managed by Vivli and AbbVie. For more information on the process, or to submit a request, visit the following link: <https://www.abbvieclinicaltrials.com/hcp/data-sharing/>.

**When available:** With publication

### Supporting Documents

**Document types:** None

### Additional Information

**Who can access the data:** Qualified researchers engaged in rigorous, independent scientific research can request access to our anonymized clinical trial data. Access will be provided following receipt of a research proposal and Statistical Analysis Plan, review of the proposal and Statistical Analysis Plan, and execution of a Data Use Agreement (DUA). All requests from qualified researchers for access to AbbVie clinical data and information will be managed by Vivli and AbbVie. For more information on the process, or to submit a request, visit the following link: <https://www.abbvieclinicaltrials.com/hcp/data-sharing/>.

**Types of analyses:** Qualified researchers engaged in rigorous, independent scientific research can request access to our anonymized clinical trial data. Access will be provided following receipt of a research proposal and Statistical Analysis Plan, review of the proposal and Statistical Analysis Plan, and execution of a Data Use Agreement (DUA). All requests from qualified researchers for access to AbbVie clinical data and information will be managed by Vivli and AbbVie. For more information on the process, or to submit a request, visit the following link: <https://www.abbvieclinicaltrials.com/hcp/data-sharing/>.

**Mechanisms of data availability:** Qualified researchers engaged in rigorous, independent scientific research can request access to our anonymized clinical trial data. Access will be provided following receipt of a research proposal and Statistical Analysis Plan, review of the proposal and Statistical Analysis Plan, and execution of a Data Use Agreement (DUA). All requests from qualified researchers for access to AbbVie clinical data and information will be managed by Vivli and AbbVie. For more information on the process, or to submit a request, visit the following link: <https://www.abbvieclinicaltrials.com/hcp/data-sharing/>.

**Any additional restrictions:** Qualified researchers engaged in rigorous, independent scientific research can request access to our anonymized clinical trial data. Access will be provided following receipt of a research proposal and Statistical Analysis Plan, review of the proposal and Statistical Analysis Plan, and execution of a Data Use Agreement (DUA). All requests from qualified researchers for access to AbbVie clinical data and information will be managed by Vivli and AbbVie. For more information on the process, or to submit a request, visit the following link: <https://www.abbvieclinicaltrials.com/hcp/data-sharing/>.
